# Supplementary material for: Tumor-infiltrating mast cells confer resistance to immunotherapy in pancreatic cancer
Source: PubMed Central journal article supplement — iScience. 2024 Sep 30;27(11):111085. doi: 10.1016/j.isci.2024.111085 (PMC11514315; doi:10.1016/j.isci.2024.111085), 2024-09-30
Supplement: mmc1.pdf [file mmc1.pdf]

iScience, Volume 27

## **Supplemental information**

### **Tumor-infiltrating mast cells confer resistance to immunotherapy in pancreatic cancer**

**Ying Ma, Xiangqin Zhao, Jingyan Feng, Suimin Qiu, Baoan Ji, Lu Huang, Patrick Hwu, Craig D. Logsdon, and Huamin Wang**

1 **Supplementary Materials**

2

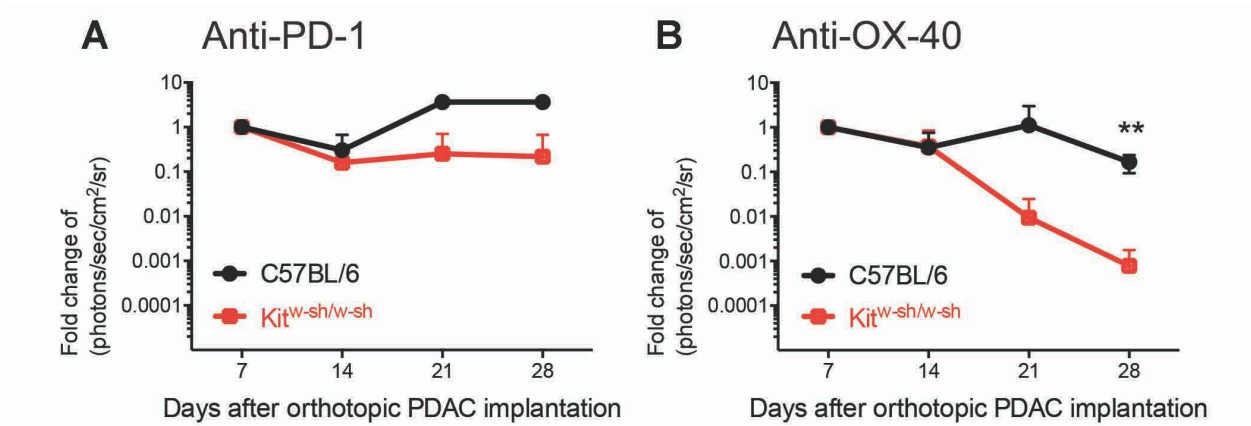

3

4 **Fig. S1. Mast Cells influenced the efficacy of in vivo antibody therapy. Related to**  
5 **Figure 2 and 4.**

6 Luciferase-transfected PDAC were injected on day 0, tumor growth was monitored by  
7 IVIS imaging. Tumor size in normal (C57BL/6) and mast cell-deficient (Kit<sup>w-sh/w-sh</sup>) mice  
8 treated with: (A) anti-PD-1; (B) agonist anti-OX-40.

9

10

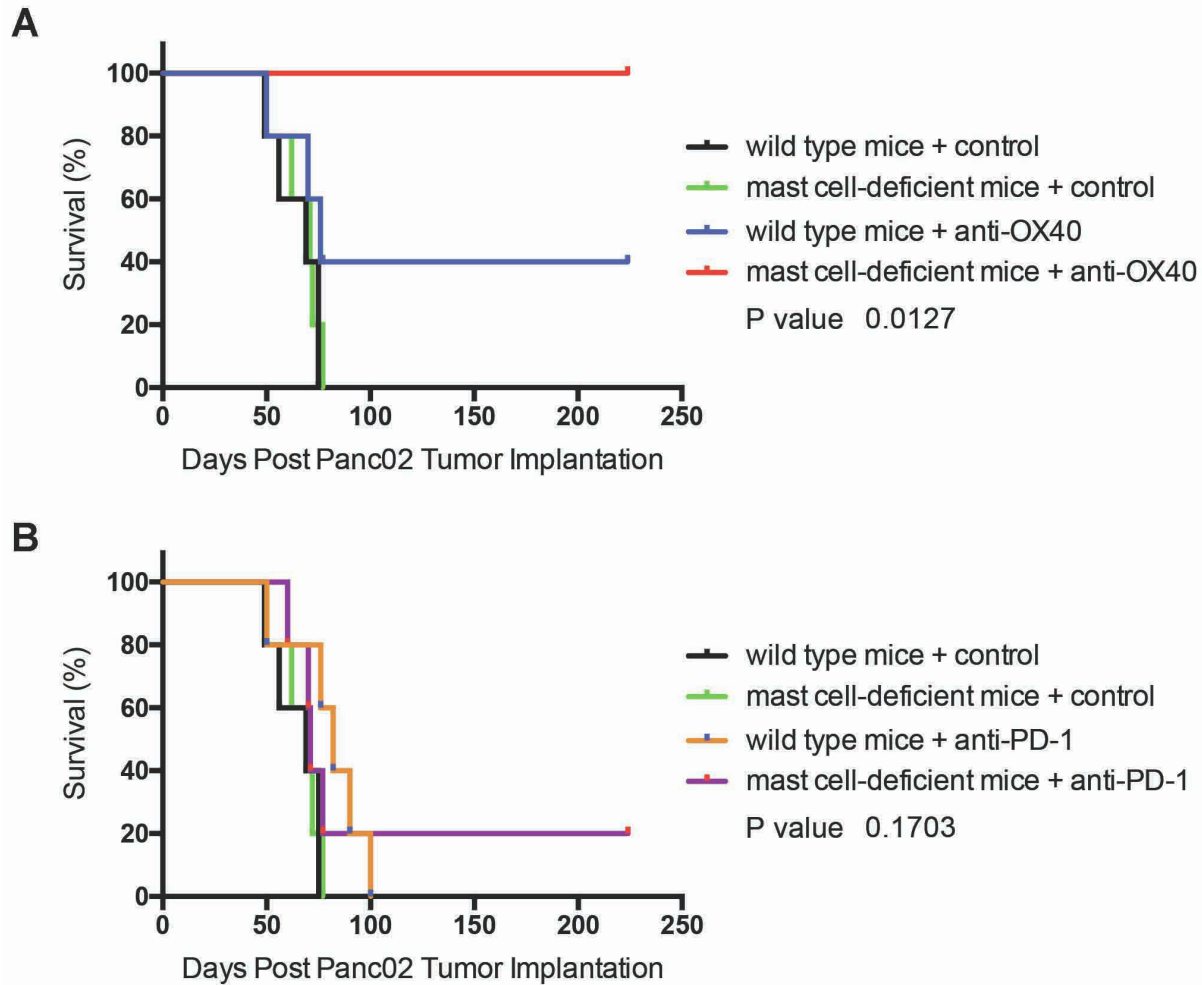

11

12 **Fig. S2. Anti-OX40 treatment improves the survival of mast cell-deficient mice**  
 13 **with orthotopic tumor implantation, compared to survival in wild-type tumor-**  
 14 **bearing mice. Related to Figure 2 and 4.**

15 (A) Anti-OX40 treated mast cell-deficient Panc02 tumor-bearing mice achieved a long-  
 16 term tumor free survival,  $P = .0127$ . (C) Survival curve of mice with Panc02 tumor  
 17 treated with anti-PD-1. Tumors were implanted on day 0.

18

19



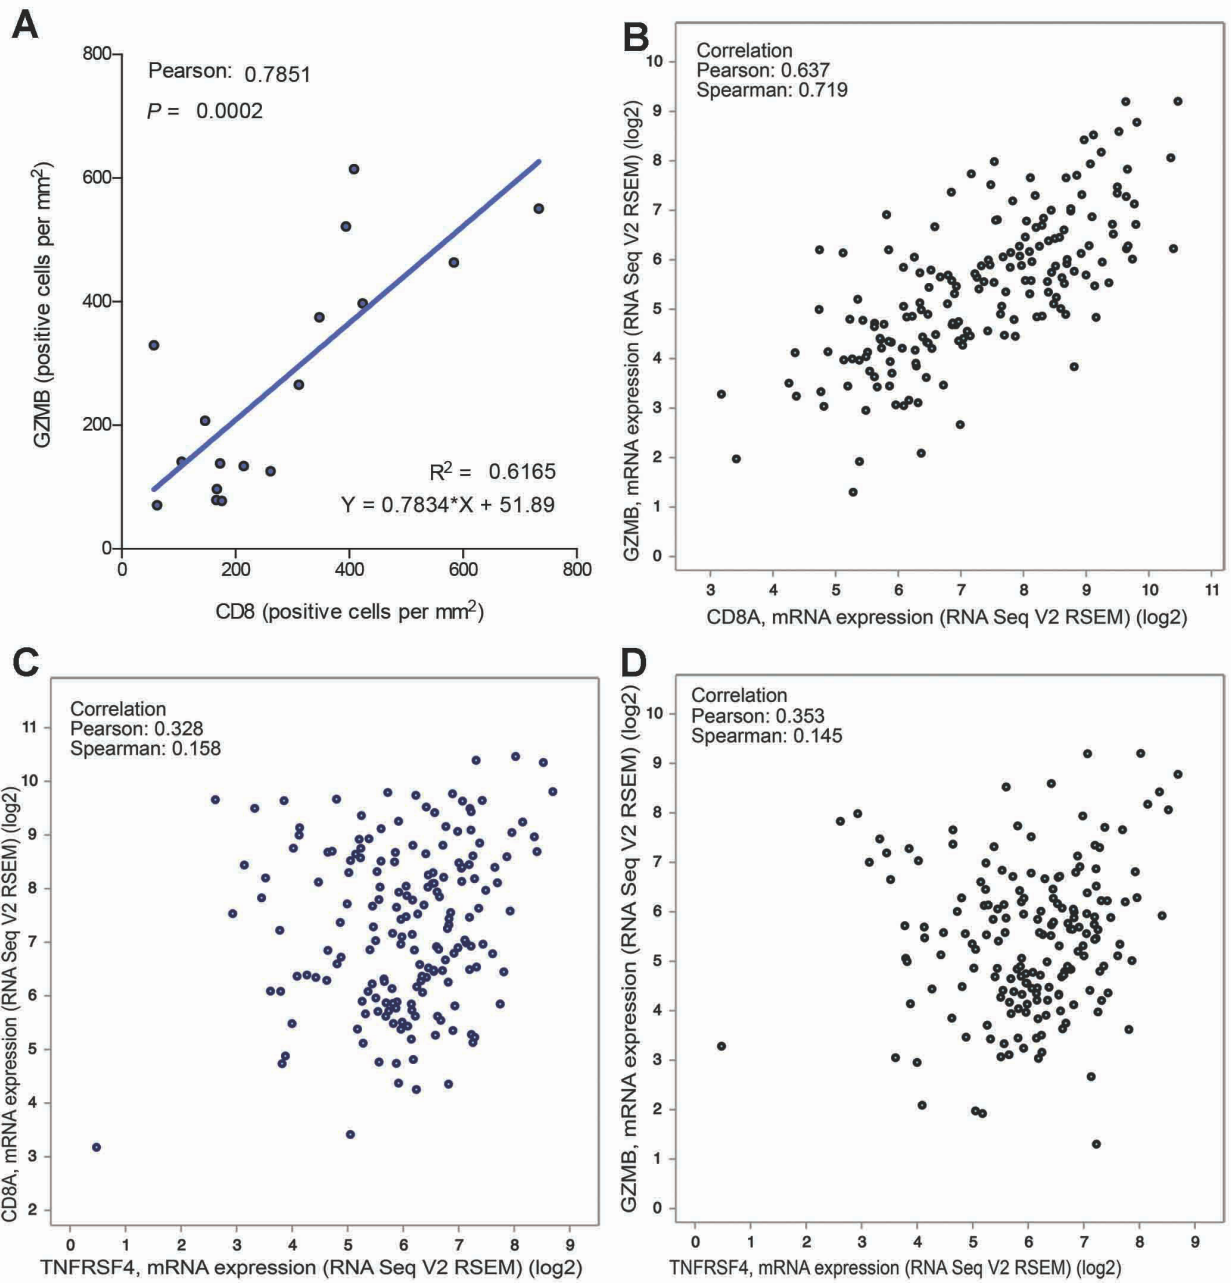

30

31 **Fig. S4. Correlation of OX40 (a.k.a. TNFRSF4) and effector CD8+ T cells (CD8A)**  
 32 **with granzyme B (GZMB) in KPC mice and PDAC patients. Related to Figure 5.**

33 (A) KPC-GEMM mice, tumor infiltrating CD8 and GZMB positive cells (reference to  
 34 Figure 5 C-F) presented strong positive linear correlation (Pearson  $r = 0.7851$  and  $P =$

35 0.0002). (B) A strong positive linear correlation between CD8A and GZMB was shown  
36 from data presented in the TCGA database. (C) Weak positive linear correlation  
37 between TNFRSF4 and CD8A or (D) GZMB analyzed from 186 PDAC patients'  
38 samples in the TCGA database.

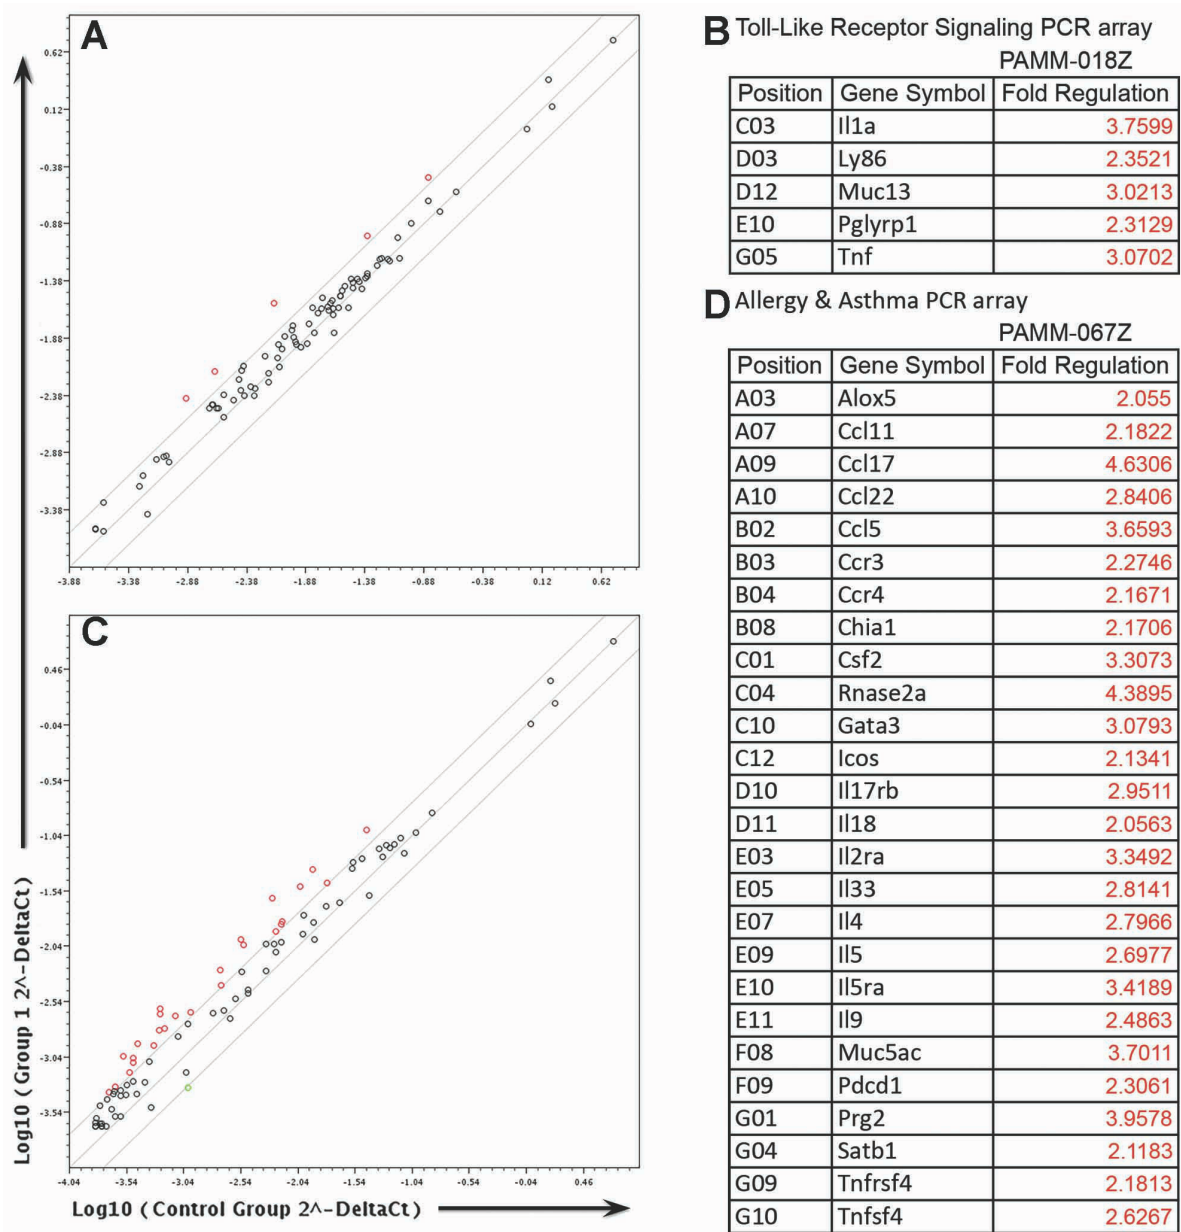

40

41

42

43

44

45

**Fig. S5. Scatter Plots (A & C) of gene expression panel and lists (B & D) of up regulated 31 genes induced by agonist anti-OX40 treatment. Related to Figure 5.** Group 1 (vertical axis) represented tumor samples from 6 mice treated with anti-OX40 and Control Group (horizontal axis) represented tumor samples from 6 mice without anti-OX40 treatment. mRNA from these tissues was applied for the panel analysis of

46 quantitative real-time PCR array. (A & B), genes from Toll-like Receptor Signaling PCR  
47 array; (C & D), genes from Allergy & Asthma PCR array. (A & C) Scatter plots were  
48 generated with Log<sub>10</sub> Fold change of mRNA expression determined by PCR Array  
49 assays ( $\Delta\Delta C_t$ ). Red dots above the left boundary line represent the genes with more  
50 than 2 fold of up regulation in anti-OX40 treated group compared to control group; black  
51 dots between the two boundary lines represent the genes expression range from 2 to -2  
52 fold-changes between the two groups; green dots below the right boundary line  
53 represent the genes with more than 2 fold down regulation in anti-OX40 treated group  
54 compared to control group. Genes with the red dots on the plots of A & C were listed in  
55 the tables of B & D. (B & D) Left column is the position of gene primers in the 96-well  
56 PCR Array plate; middle column is the gene symbols of the red dots on A & C; right  
57 column is the fold regulation of those red dot genes in anti-OX40 treatment group  
58 compared to control.

59

60

61



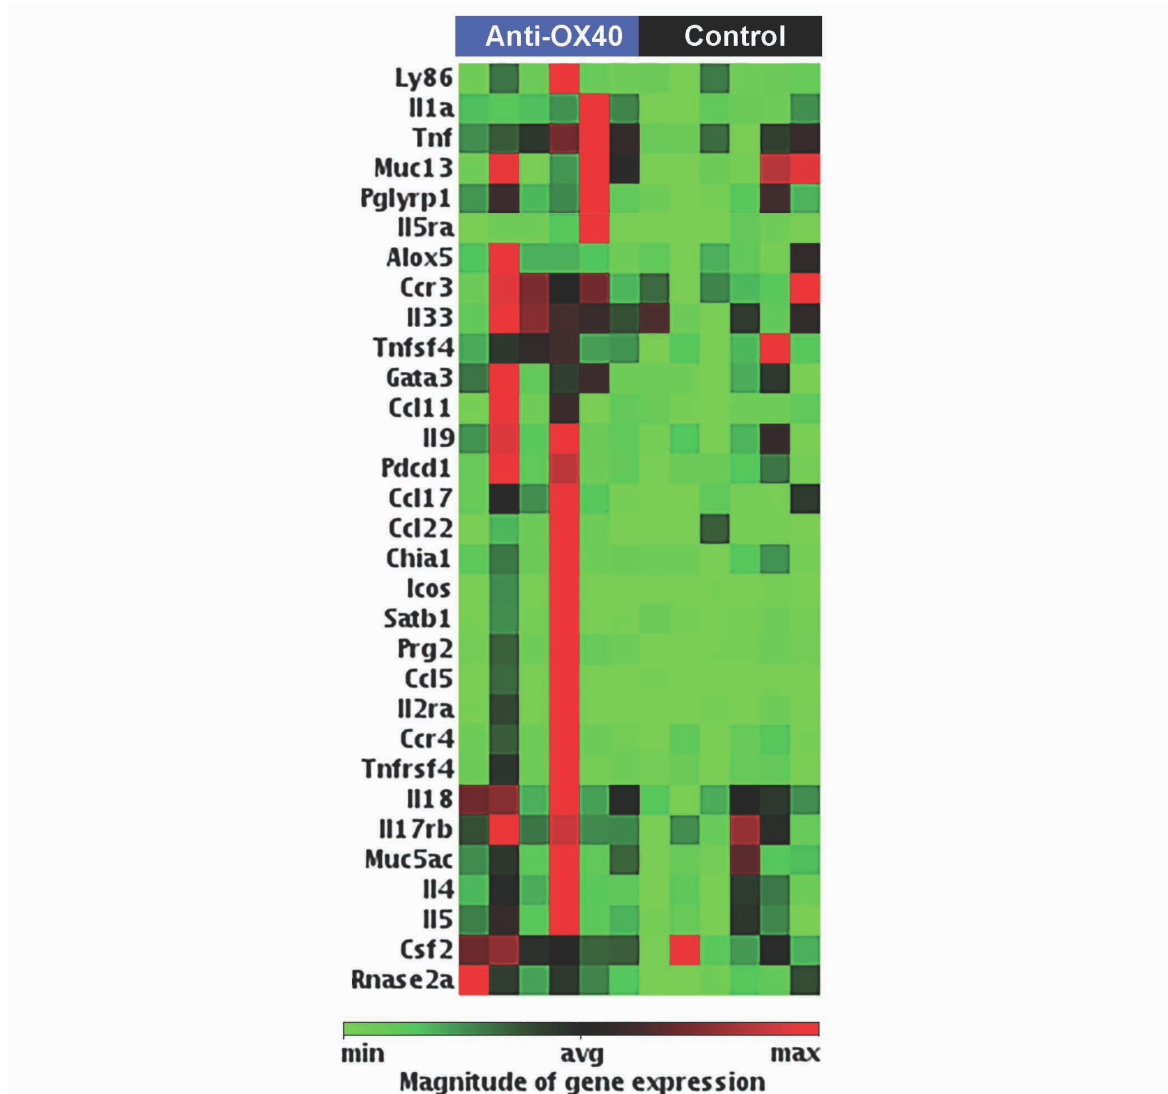

62

63 **Fig. S6. Clustergrams of 31 genes up regulated following agonist anti-OX40**  
 64 **treatment. Related to Figure 5.**

65 The left 6 columns represent tumor samples from 6 mice treated with anti-OX40 and the  
 66 right columns represent tumor samples from 6 mice treated with the isotype control.

67 These 31 genes were from both the Toll-like Receptor Signaling genes and Allergy &  
 68 Asthma genes in PCR arrays. This heatmap presents the reproducibility and variation  
 69 of those 31 genes with two-fold up regulation.

70

|         | PDCD1  | CCL22  | LY86    | ICOS    | CCL5    | CCR4   | CCL17  | PRG2   | IL2RA   | TNF    | CCL11  | RNASE2 | TNFRSF4 | CHIA    | ALOX5   | PGLYRP1 | SATB1   | IL5    | IL33   | GATA3   | IL5RA  | IL1A   | CCR3   | TNFSF4 | IL4     | IL9   | CSF2   | IL18    | IL17RB | MUC13   |
|---------|--------|--------|---------|---------|---------|--------|--------|--------|---------|--------|--------|--------|---------|---------|---------|---------|---------|--------|--------|---------|--------|--------|--------|--------|---------|-------|--------|---------|--------|---------|
| PDCD1   | 1.00   | .586** | .693    | .808**  | .719    | .690   | .278** | 0.12   | .424**  | .196** | 0.12   | 0.13   | .566**  | 0.03    | 0.07    | .196**  | .238**  | -0.04  | .351** | 0.03    | .250** | 0.04   | 0.05   | -0.04  | -0.06   | -0.03 | -0.01  | 0.02    | -0.13  | -.171*  |
| CCL22   | .586** | 1.00   | .680    | .667    | .555    | .761   | .672   | 0.05   | .404**  | .262** | .184*  | .274** | .534**  | -0.08   | 0.13    | 0.10    | .293**  | -0.01  | .392** | 0.08    | .258** | 0.04   | 0.05   | 0.10   | -0.02   | 0.01  | 0.13   | 0.04    | -.157* | -.173*  |
| LY86    | .693   | .680   | 1.00    | .772    | .672    | .652   | .408** | 0.10   | .527**  | .201** | .218** | .492** | .520**  | -0.02   | 0.11    | .163*   | .306**  | -0.05  | .443** | 0.02    | .294** | -0.06  | 0.08   | .191*  | -0.08   | -0.03 | 0.03   | 0.06    | -.181* | -.219** |
| ICOS    | .808** | .667   | .772    | 1.00    | .737    | .774   | .365** | 0.05   | .483**  | .237** | .172*  | .169*  | .485**  | -0.03   | 0.04    | 0.14    | .345**  | -0.07  | .459** | 0.06    | .325** | 0.00   | 0.05   | 0.12   | -0.05   | -0.03 | -0.02  | -0.02   | -0.13  | -.182*  |
| CCL5    | .719   | .555   | .672    | .737    | 1.00    | .701   | .295** | 0.08   | .448**  | .232** | .272** | .220** | .386**  | -0.05   | 0.05    | .263**  | .304**  | -0.05  | .498** | 0.02    | .256** | -0.07  | 0.11   | 0.08   | -0.05   | -0.01 | -0.02  | 0.01    | -0.12  | -.224** |
| CCR4    | .690   | .761   | .652    | .774    | .701    | 1.00   | .494** | -0.04  | .504**  | .195** | .172*  | .185*  | .338**  | -0.08   | 0.04    | .164*   | .460**  | -0.05  | .570** | 0.05    | .311** | -0.06  | 0.10   | 0.13   | -0.06   | -0.02 | -0.02  | -0.12   | -0.14  | -.172*  |
| CCL17   | .278** | .672   | .408**  | .365**  | .295**  | .494** | 1.00   | 0.01   | .397**  | .214** | 0.08   | .332** | .272**  | -0.06   | .179*   | 0.07    | .195**  | -0.03  | .293** | 0.04    | .345** | -0.01  | 0.05   | 0.11   | -0.05   | 0.00  | .188*  | 0.09    | -0.05  | -0.11   |
| PRG2    | 0.12   | 0.05   | 0.10    | 0.05    | 0.08    | -0.04  | 0.01   | 1.00   | -0.07   | 0.14   | .183*  | 0.05   | .258**  | 0.02    | 0.06    | 0.07    | -0.05   | 0.01   | -0.01  | -0.01   | -0.09  | 0.13   | 0.02   | -0.01  | 0.00    | -0.05 | 0.08   | .187*   | 0.07   | -.150*  |
| IL2RA   | .424** | .404** | .527**  | .483**  | .448**  | .504** | .397** | -0.07  | 1.00    | .153*  | .221** | .545** | .225**  | -0.10   | 0.04    | 0.11    | .200**  | -0.05  | .249** | 0.02    | .334** | 0.04   | 0.05   | .427** | -0.05   | 0.03  | 0.14   | 0.04    | -.158* | -.182*  |
| TNF     | .196** | .262** | .201**  | .237**  | .232**  | .195** | .214** | 0.14   | .153*   | 1.00   | 0.09   | 0.05   | .207**  | -0.08   | 0.11    | .155**  | 0.01    | 0.12   | 0.07   | -0.05   | .207** | 0.06   | .407** | 0.11   | -0.04   | -0.03 | .200** | 0.11    | -0.03  | -0.10   |
| CCL11   | 0.12   | .184*  | .218**  | .172*   | .272**  | .172*  | 0.09   | .183*  | .221**  | 0.08   | 1.00   | .238** | .194*   | -0.05   | -.190*  | .226**  | 0.13    | 0.02   | .364** | -0.02   | .165*  | 0.07   | .244** | .330** | -0.06   | -0.04 | -0.04  | -0.02   | -0.10  | -0.14   |
| RNASE2  | 0.13   | .274** | .492**  | .169*   | .220**  | .185** | .332** | 0.08   | .545**  | 0.08   | .238** | 1.00   | .148*   | -0.07   | 0.11    | 0.05    | 0.12    | -0.05  | .152** | 0.02    | .205** | 0.02   | 0.05   | .272** | -0.08   | -0.03 | .261** | .194**  | -0.11  | -.147*  |
| TNFRSF4 | .566** | .534** | .529**  | .485**  | .386**  | .338** | .272** | .258** | .225**  | .207** | .194** | .148*  | 1.00    | 0.14    | 0.11    | 0.09    | 0.05    | 0.05   | 0.04   | 0.04    | 0.03   | 0.03   | 0.02   | 0.02   | 0.01    | 0.00  | 0.00   | -0.02   | -0.12  | -0.14   |
| CHIA    | 0.03   | -0.08  | -0.02   | -0.01   | -0.05   | -0.08  | -0.03  | 0.02   | 0.10    | -0.05  | -0.09  | 0.01   | 0.14    | 1.00    | -.166** | 0.07    | -0.03   | -0.01  | 0.00   | 0.05    | -0.01  | -0.05  | -0.03  | -0.05  | -0.02   | -0.02 | -0.07  | -.151*  | -0.03  | 0.08    |
| ALOX5   | 0.07   | 0.13   | 0.11    | 0.04    | 0.05    | 0.04   | .179*  | 0.06   | 0.04    | 0.11   | -.190* | 0.11   | 0.11    | -.186** | 1.00    | -0.07   | 0.00    | -0.07  | -0.14  | 0.07    | -0.09  | -0.04  | 0.02   | -0.04  | -0.13   | 0.07  | 0.05   | .208**  | -0.03  | -0.02   |
| PGLYRP1 | .196** | 0.10   | .163*   | 0.14    | .263**  | .164*  | 0.07   | 0.07   | 0.31    | .155** | .226** | 0.05   | 0.09    | 0.07    | -0.07   | 1.00    | 0.11    | 0.01   | .417** | -0.11   | 0.10   | -0.03  | 0.15   | -0.01  | -0.02   | -0.01 | -0.05  | 0.01    | -0.04  | -0.06   |
| SATB1   | .238** | .293** | .306**  | .345**  | .304**  | .460** | .195** | -0.05  | .200**  | 0.01   | 0.13   | 0.12   | 0.05    | -0.03   | 0.00    | 0.11    | 1.00    | -0.07  | .415** | -0.02   | .212** | -0.12  | 0.04   | 0.05   | -0.05   | 0.04  | -0.08  | -.183*  | -0.01  | -.246** |
| IL5     | -0.04  | -0.01  | -0.05   | -0.07   | -0.06   | -0.06  | -0.03  | 0.01   | -0.03   | 0.12   | 0.02   | -0.05  | 0.05    | -0.01   | 0.07    | 0.01    | -0.07   | 1.00   | -0.07  | -0.02   | 0.09   | -0.03  | .335** | -0.04  | 0.08    | 0.07  | 0.08   | -0.04   | 0.05   | 0.03    |
| IL33    | .351** | .392** | .443**  | .459**  | .498**  | .570** | .293** | -0.01  | .249**  | 0.07   | .364** | .152*  | 0.04    | 0.00    | -0.14   | .417**  | .415**  | -0.07  | 1.00   | -0.11   | .285** | -0.11  | 0.08   | 0.01   | -0.04   | -0.04 | -0.09  | -0.13   | -0.13  | -.154*  |
| GATA3   | 0.03   | 0.08   | 0.02    | 0.00    | 0.02    | 0.05   | 0.04   | -0.01  | 0.02    | -0.05  | -0.05  | 0.02   | 0.04    | 0.05    | 0.07    | -0.11   | -0.02   | -0.02  | -0.11  | 1.00    | -0.04  | -0.03  | -0.03  | -0.02  | -0.02   | 0.07  | 0.03   | .197**  | -.147* | -0.14   |
| IL5RA   | .250** | .258** | .294**  | .325**  | .256**  | .311** | .345** | -0.09  | .334**  | .207** | .165** | .205** | 0.03    | -0.01   | 0.06    | 0.10    | .212**  | 0.05   | .285** | -0.04   | 1.00   | -0.07  | .175** | .311** | 0.08    | -0.02 | -0.02  | 0.05    | -0.05  | -0.12   |
| IL1A    | 0.04   | 0.04   | -0.06   | 0.00    | -0.07   | -0.08  | -0.01  | 0.13   | 0.04    | 0.05   | 0.07   | 0.02   | 0.03    | -0.05   | -0.04   | -0.03   | -0.12   | -0.03  | -0.11  | -0.02   | -0.07  | 1.00   | -0.03  | .148*  | -0.04   | -0.02 | .309** | .241**  | -0.04  | -0.05   |
| CCR3    | 0.05   | 0.05   | 0.08    | 0.00    | 0.11    | 0.10   | 0.05   | 0.02   | 0.08    | .407** | .244** | 0.05   | 0.02    | -0.05   | 0.02    | 0.15    | 0.04    | .335** | 0.08   | -0.05   | .175** | -0.03  | 1.00   | 0.05   | -0.03   | 0.02  | -0.02  | 0.07    | -0.05  | -0.01   |
| TNFSF4  | 0.04   | 0.10   | .191*   | 0.12    | 0.08    | 0.13   | 0.11   | -0.01  | .427**  | 0.11   | .330** | .272** | 0.02    | -0.05   | -0.04   | -0.01   | 0.06    | -0.04  | 0.01   | 0.04    | .311** | .148*  | 0.05   | 1.00   | -0.07   | 0.01  | 0.08   | 0.07    | -0.10  | -0.13   |
| IL4     | -0.06  | -0.02  | -0.05   | -0.01   | -0.05   | -0.08  | -0.03  | 0.00   | -0.06   | -0.04  | -0.09  | -0.06  | 0.01    | -0.02   | -0.13   | -0.02   | -0.05   | 0.01   | -0.04  | -0.02   | 0.01   | -0.04  | -0.03  | -0.07  | 1.00    | -0.01 | -0.05  | -.162*  | 0.03   | -0.03   |
| IL9     | -0.03  | 0.01   | -0.03   | -0.03   | -0.01   | -0.02  | 0.00   | -0.05  | -0.02   | -0.03  | -0.04  | -0.03  | 0.00    | -0.02   | 0.07    | -0.01   | 0.04    | 0.07   | -0.04  | 0.07    | -0.02  | -0.02  | -0.02  | -0.01  | -0.01   | 1.00  | -0.02  | -0.03   | 0.00   | 0.00    |
| CSF2    | 0.01   | 0.13   | 0.05    | -0.02   | -0.02   | -0.02  | .188** | 0.08   | 0.14    | .200** | -0.04  | .261** | 0.00    | -0.07   | 0.08    | -0.05   | -0.05   | 0.05   | -0.09  | 0.03    | -0.02  | .309** | -0.02  | 0.05   | -0.05   | -0.02 | 1.00   | .198**  | -0.07  | 0.02    |
| IL18    | 0.02   | 0.04   | 0.06    | -0.01   | 0.01    | -0.12  | 0.03   | .187** | 0.04    | 0.11   | -0.02  | .194** | -0.02   | -.151*  | .208**  | 0.01    | -.163*  | -0.04  | -0.13  | .197**  | 0.05   | .241** | 0.01   | 0.07   | -.162** | -0.03 | .198** | 1.00    | -0.01  | -.201** |
| IL17RB  | -0.13  | -.157* | -.181*  | -0.13   | -0.12   | -0.14  | -0.08  | 0.07   | -.158*  | -0.03  | -0.10  | -0.11  | -0.12   | -0.08   | -0.03   | -0.04   | -0.08   | 0.05   | -0.13  | -.147** | -0.08  | -0.04  | -0.08  | -0.10  | 0.03    | 0.00  | -0.07  | -0.05   | 1.00   | 0.14    |
| MUC13   | -.171* | -.173* | -.219** | -.182** | -.224** | -.172* | -0.11  | -.150* | -.182** | -0.10  | -0.14  | -.147* | -0.14   | 0.05    | -0.03   | -0.08   | -.246** | 0.03   | -.154* | -0.14   | -0.12  | -0.05  | -0.01  | -0.13  | -0.03   | 0.00  | 0.02   | -.201** | 0.11   | 1.00    |

|        |       |        |        |        |        |        |        |        |        |       |
|--------|-------|--------|--------|--------|--------|--------|--------|--------|--------|-------|
| -0.999 | 0.001 | .100*  | .200** | .300** | .400** | .500** | .600** | .700** | .800** | 1.000 |
| -0.001 | 0.000 | .199** | .299** | .399** | .499** | .599** | .699** | .799** | .899** | 1.000 |

Pearson correlation: low

high

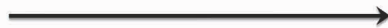

\*\* . Correlation is significant at the 0.01 level (2-tailed).

\* . Correlation is significant at the 0.05 level (2-tailed).

71

72 Fig. S7. TCGA correlation of 30 inflammatory genes up-regulated by OX40.

73 Related to Figure 6. (MUC5AC data was not available in TCGA database). Genes

74 were sorted according to their correlation index (Pearson r value) with TNFRSF4 (both  
75 row and column) from the largest to the smallest.

76

77

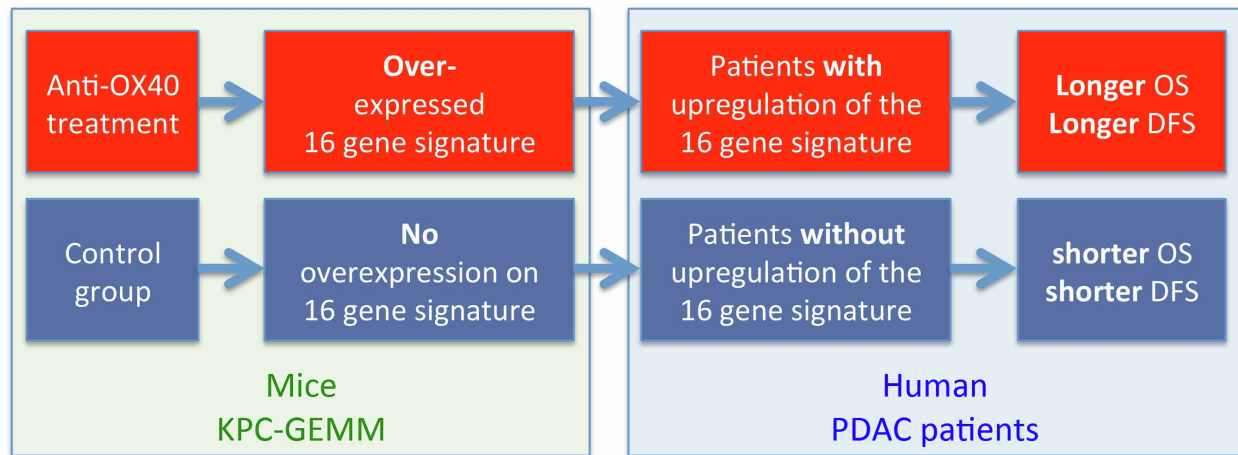

78

79 **Fig. S8. OX40 signature genes derived from treated mice can be used to stratify**  
 80 **patients for predicting survival benefit. Related to Figure 7.**

81 KPC GEMM models were treated with agonist OX40 antibodies, and a consistent 16-  
 82 gene signature was identified upon transcriptional profiling. This signature was then  
 83 interrogated in the TCGA PDAC subset (Right). PDAC with presence of the OX40  
 84 induced transcriptional signature has significantly higher disease-free and overall  
 85 survival compared to tumors without the signature.

86

87

88

|                | B             | Sig.         | Exp(B)            | 95.0% CI for Exp(B) |                |
|----------------|---------------|--------------|-------------------|---------------------|----------------|
|                |               |              |                   | Lower               | Upper          |
| GATA3          | -0.080        | 0.857        | 0.923             | 0.389               | 2.192          |
| PDCD1          | -3.004        | 0.064        | 0.050             | 0.002               | 1.195          |
| <b>CCL22</b>   | <b>11.616</b> | 0.966        | <b>110806.830</b> | 0.000               | 1.03E+239      |
| LY86           | -5.969        | 0.994        | 0.003             | 0.000               | .              |
| <b>ICOS</b>    | <b>2.226</b>  | 0.190        | <b>9.262</b>      | 0.333               | 257.536        |
| <b>CCL5</b>    | <b>0.799</b>  | 0.461        | <b>2.223</b>      | 0.266               | 18.539         |
| <b>CCR4</b>    | <b>1.359</b>  | 0.093        | <b>3.892</b>      | 0.798               | 18.987         |
| CCL17          | -1.395        | 0.223        | 0.248             | 0.026               | 2.340          |
| PRG2           | -1.101        | 0.008        | 0.333             | 0.147               | 0.753          |
| IL2RA          | -0.955        | 0.069        | 0.385             | 0.138               | 1.076          |
| TNF            | -0.080        | 0.881        | 0.923             | 0.325               | 2.626          |
| <b>CCL11</b>   | <b>1.106</b>  | 0.095        | <b>3.023</b>      | 0.825               | 11.074         |
| <b>RNASE2</b>  | <b>0.510</b>  | 0.533        | <b>1.666</b>      | 0.335               | 8.278          |
| <b>TNFRSF4</b> | <b>13.792</b> | 0.984        | <b>977169.132</b> | 0.000               | .              |
| <b>CHIA</b>    | <b>11.422</b> | 0.961        | <b>91271.291</b>  | 0.000               | 1.20E+203      |
| <b>ALOX5</b>   | <b>0.692</b>  | 0.354        | <b>1.997</b>      | 0.462               | 8.635          |
| <b>PGLYRP1</b> | <b>0.590</b>  | 0.611        | <b>1.805</b>      | 0.185               | 17.574         |
| <b>SATB1</b>   | <b>1.179</b>  | 0.258        | <b>3.251</b>      | 0.421               | 25.097         |
| IL5            | -0.520        | 0.331        | 0.594             | 0.208               | 1.695          |
| IL33           | -0.879        | 0.229        | 0.415             | 0.099               | 1.739          |
| IL5RA          | -0.001        | 0.999        | 0.999             | 0.316               | 3.165          |
| <b>IL1A</b>    | <b>2.470</b>  | <b>0.028</b> | <b>11.825</b>     | <b>1.314</b>        | <b>106.392</b> |
| <b>CCR3</b>    | <b>1.119</b>  | 0.135        | <b>3.062</b>      | 0.706               | 13.289         |
| TNFSF4         | -0.626        | 0.153        | 0.535             | 0.227               | 1.263          |
| <b>IL4</b>     | <b>2.194</b>  | <b>0.031</b> | <b>8.967</b>      | <b>1.217</b>        | <b>66.048</b>  |
| IL9            | -0.271        | 0.713        | 0.762             | 0.179               | 3.241          |
| <b>CSF2</b>    | <b>0.100</b>  | 0.928        | <b>1.105</b>      | 0.129               | 9.470          |
| IL18           |               | 0.522        |                   |                     |                |
| IL18(1)        | -12.321       | 0.957        | 0.000             | 0.000               | 3.16E+188      |
| IL18(2)        | -0.567        | 0.254        | 0.567             | 0.214               | 1.504          |
| IL17RB         | -0.271        | 0.716        | 0.762             | 0.177               | 3.281          |
| <b>MUC13</b>   | <b>0.489</b>  | 0.375        | <b>1.630</b>      | 0.553               | 4.806          |

89

90 **Fig. S9. Validation of OX40 up-regulated 16-gene signature in a publicly available**  
91 **single cell RNA sequencing dataset. Related to Figure 7.**

92 (A) Heatmap of expression levels (TPM values) of 16 genes across various cell types.

93 (B) Correlation analysis results of the average expression levels of the 16 genes with T  
94 cell proportions in various samples.

95

96

97

98 **Table S1. Multivariate Cox regression analyses of OX40 up-regulated 30**  
 99 **inflammatory genes for OS. Related to Figure 7.**

|                | B             | Sig.         | Exp(B)            | 95.0% CI for Exp(B) |                |
|----------------|---------------|--------------|-------------------|---------------------|----------------|
|                |               |              |                   | Lower               | Upper          |
| GATA3          | -0.080        | 0.857        | 0.923             | 0.389               | 2.192          |
| PDCD1          | -3.004        | 0.064        | 0.050             | 0.002               | 1.195          |
| <b>CCL22</b>   | <b>11.616</b> | 0.966        | <b>110806.830</b> | 0.000               | 1.03E+239      |
| LY86           | -5.969        | 0.994        | 0.003             | 0.000               |                |
| <b>ICOS</b>    | <b>2.226</b>  | 0.190        | <b>9.262</b>      | 0.333               | 257.536        |
| <b>CCL5</b>    | <b>0.799</b>  | 0.461        | <b>2.223</b>      | 0.266               | 18.539         |
| <b>CCR4</b>    | <b>1.359</b>  | 0.093        | <b>3.892</b>      | 0.798               | 18.987         |
| CCL17          | -1.395        | 0.223        | 0.248             | 0.026               | 2.340          |
| PRG2           | -1.101        | 0.008        | 0.333             | 0.147               | 0.753          |
| IL2RA          | -0.955        | 0.069        | 0.385             | 0.138               | 1.076          |
| TNF            | -0.080        | 0.881        | 0.923             | 0.325               | 2.626          |
| <b>CCL11</b>   | <b>1.106</b>  | 0.095        | <b>3.023</b>      | 0.825               | 11.074         |
| <b>RNASE2</b>  | <b>0.510</b>  | 0.533        | <b>1.666</b>      | 0.335               | 8.278          |
| <b>TNFRSF4</b> | <b>13.792</b> | 0.984        | <b>977169.132</b> | 0.000               |                |
| <b>CHIA</b>    | <b>11.422</b> | 0.961        | <b>91271.291</b>  | 0.000               | 1.20E+203      |
| <b>ALOX5</b>   | <b>0.692</b>  | 0.354        | <b>1.997</b>      | 0.462               | 8.635          |
| <b>PGLYRP1</b> | <b>0.590</b>  | 0.611        | <b>1.805</b>      | 0.185               | 17.574         |
| <b>SATB1</b>   | <b>1.179</b>  | 0.258        | <b>3.251</b>      | 0.421               | 25.097         |
| IL5            | -0.520        | 0.331        | 0.594             | 0.208               | 1.695          |
| IL33           | -0.879        | 0.229        | 0.415             | 0.099               | 1.739          |
| IL5RA          | -0.001        | 0.999        | 0.999             | 0.316               | 3.165          |
| <b>IL1A</b>    | <b>2.470</b>  | <b>0.028</b> | <b>11.825</b>     | <b>1.314</b>        | <b>106.392</b> |

|         |         |       |       |       |           |
|---------|---------|-------|-------|-------|-----------|
| CCR3    | 1.119   | 0.135 | 3.062 | 0.706 | 13.289    |
| TNFSF4  | -0.626  | 0.153 | 0.535 | 0.227 | 1.263     |
| IL4     | 2.194   | 0.031 | 8.967 | 1.217 | 66.048    |
| IL9     | -0.271  | 0.713 | 0.762 | 0.179 | 3.241     |
| CSF2    | 0.100   | 0.928 | 1.105 | 0.129 | 9.470     |
| IL18    |         | 0.522 |       |       |           |
| IL18(1) | -12.321 | 0.957 | 0.000 | 0.000 | 3.16E+188 |
| IL18(2) | -0.567  | 0.254 | 0.567 | 0.214 | 1.504     |
| IL17RB  | -0.271  | 0.716 | 0.762 | 0.177 | 3.281     |
| MUC13   | 0.489   | 0.375 | 1.630 | 0.553 | 4.806     |

100 Sig: P value; Exp(B): OR (odd ratio); CI: confidence interval. The 30 inflammatory genes up regulated  
101 with anti-OX40 treatment were narrowed down to a 16 genes signature (red: OR > 1), which will  
102 contribute to the survival benefit.

103

104

105 **Abbreviations:**

106 PDAC, pancreatic ductal adenocarcinoma

107 NP, normal pancreas

108 CP, chronic pancreatitis

109 PanIN, pancreatic intraepithelial neoplasia

110 KPC-GEMM,  $Kras^{G12D/+}; Trp53^{R172H/+}; Pdx-1-Cre$  genetically engineered mouse model

111 KC,  $Pdx-1-Cre \times LSL-Kras^{G12D}$ ; mice

112 KCLW,  $Kit^{W-sh/W-sh} \times Pdx-1-Cre \times LSL-Kras^{G12D} \times LSL-Luciferase$  mice

113 KCLB, wild-type  $Kit$  with C57BL/6 background,  $Pdx-1-Cre \times LSL-Kras^{G12D} \times LSL-$

114  $Luciferase$  mice

115 BLI, bioluminescence imaging

116 TCGA, The Cancer Genome Atlas

117 BMDC, bone marrow-derived mast cells

118 GZMB, granzyme B

119 OR, odd ratio

120 CI, confidence interval

121

122

123

124
